# Supplementary material for: A Life Cycle Assessment of Rice–Rice and Rice–Cowpea Cropping Systems in the West Coast of India
Source: MDPI journal article supplement (doi:10.3390/land12020502), 2023-02-17
Supplement: s1 [file s1]

**Supplementary Table S1. Input and output data collected from farmer's field in rice-rice system.**

| Farm<br>ers | Labour<br>(man hr) | Machine<br>ry (hr) | Diese<br>l (l) | FYM<br>(kg) | Seeds<br>(kg) | Nitroge<br>n (kg) | Phosphor<br>us (kg) | Potassiu<br>m (kg) | Kharif Grain<br>yield (kg) | Kharif straw<br>yield (kg) | Rabi Grain<br>yield (kg) | Rabi straw<br>yield (kg) | Total Grain<br>yield (kg) | Total straw<br>yield (kg) |
|-------------|--------------------|--------------------|----------------|-------------|---------------|-------------------|---------------------|--------------------|----------------------------|----------------------------|--------------------------|--------------------------|---------------------------|---------------------------|
| 1           | 720                | 41                 | 99.2           | 5000        | 111           | 177               | 78                  | 126                | 3300.0                     | 4455                       | 3960                     | 5346                     | 7260                      | 9801                      |
| 2           | 672                | 40.4               | 97.3           | 5200        | 110           | 192               | 87                  | 113                | 2850.0                     | 3848                       | 3420                     | 4617                     | 6270                      | 8465                      |
| 3           | 736                | 40                 | 96.0           | 5100        | 110           | 168               | 72                  | 105                | 3789.0                     | 5115                       | 4546.8                   | 6138                     | 8336                      | 11253                     |
| 4           | 800                | 39                 | 92.8           | 4925        | 116           | 130               | 48                  | 119                | 4200.0                     | 5670                       | 5040                     | 6804                     | 9240                      | 12474                     |
| 5           | 880                | 37.4               | 87.7           | 4975        | 120           | 156               | 65                  | 117                | 5450.0                     | 7358                       | 6540                     | 8829                     | 11990                     | 16187                     |
| 6           | 768                | 38.8               | 92.2           | 4943        | 125           | 145               | 58                  | 114                | 5000.0                     | 6750                       | 6000                     | 8100                     | 11000                     | 14850                     |
| 7           | 736                | 37.6               | 88.3           | 5700        | 117           | 153               | 63                  | 112                | 5240.0                     | 7074                       | 6288                     | 8489                     | 11528                     | 15563                     |
| 8           | 752                | 39.2               | 93.4           | 4878        | 110           | 156               | 65                  | 116                | 4250.0                     | 5738                       | 5100                     | 6885                     | 9350                      | 12623                     |
| 9           | 784                | 38.6               | 91.5           | 4845        | 112           | 149               | 60                  | 113                | 3895.0                     | 5258                       | 4674                     | 6310                     | 8569                      | 11568                     |
| 10          | 816                | 38.2               | 90.2           | 4813        | 115           | 156               | 65                  | 105                | 4750.0                     | 6413                       | 5700                     | 7695                     | 10450                     | 14108                     |
| 11          | 800                | 38.4               | 90.9           | 4780        | 116           | 168               | 72                  | 112                | 3900.0                     | 5265                       | 4680                     | 6318                     | 8580                      | 11583                     |
| 12          | 672                | 41                 | 99.2           | 4748        | 117           | 170               | 73                  | 122                | 4000.0                     | 5400                       | 4800                     | 6480                     | 8800                      | 11880                     |
| 13          | 624                | 41.4               | 100.5          | 3800        | 118           | 176               | 77                  | 116                | 4200.0                     | 5670                       | 5040                     | 6804                     | 9240                      | 12474                     |
| 14          | 560                | 42.8               | 105.0          | 4683        | 118           | 189               | 85                  | 110                | 4700.0                     | 6345                       | 5640                     | 7614                     | 10340                     | 13959                     |
| 15          | 608                | 41.6               | 101.1          | 4650        | 119           | 198               | 91                  | 93                 | 3800.0                     | 5130                       | 4560                     | 6156                     | 8360                      | 11286                     |
| 16          | 624                | 41.4               | 100.5          | 4618        | 120           | 227               | 109                 | 108                | 4300.0                     | 5805                       | 5160                     | 6966                     | 9460                      | 12771                     |
| 17          | 528                | 43                 | 105.6          | 4585        | 121           | 198               | 91                  | 80                 | 3980.0                     | 5373                       | 4776                     | 6448                     | 8756                      | 11821                     |
| 18          | 576                | 42.6               | 104.3          | 4553        | 122           | 205               | 95                  | 107                | 4500.0                     | 6075                       | 5400                     | 7290                     | 9900                      | 13365                     |
| 19          | 592                | 42.8               | 105.0          | 4520        | 123           | 218               | 103                 | 112                | 4570.0                     | 6170                       | 5484                     | 7403                     | 10054                     | 13573                     |
| 20          | 512                | 43.6               | 107.5          | 4488        | 124           | 189               | 85                  | 106                | 4250.0                     | 5738                       | 5100                     | 6885                     | 9350                      | 12623                     |
| 21          | 480                | 44                 | 108.8          | 6500        | 124           | 176               | 77                  | 95                 | 4000.0                     | 5400                       | 4800                     | 6480                     | 8800                      | 11880                     |
| 22          | 560                | 42.2               | 103.0          | 4423        | 125           | 182               | 81                  | 104                | 4100.0                     | 5535                       | 4920                     | 6642                     | 9020                      | 12177                     |
| 23          | 592                | 43.4               | 106.9          | 4800        | 126           | 186               | 83                  | 101                | 4200.0                     | 5670                       | 5040                     | 6804                     | 9240                      | 12474                     |
| 24          | 624                | 43.8               | 108.2          | 4358        | 127           | 198               | 91                  | 108                | 4400.0                     | 5940                       | 5280                     | 7128                     | 9680                      | 13068                     |
| 25          | 672                | 41                 | 99.2           | 4325        | 128           | 205               | 95                  | 102                | 3950.0                     | 5333                       | 4740                     | 6399                     | 8690                      | 11732                     |
| 26          | 720                | 38                 | 89.6           | 4293        | 129           | 154               | 63                  | 112                | 3800.0                     | 5130                       | 4560                     | 6156                     | 8360                      | 11286                     |
| 27          | 768                | 39                 | 92.8           | 5900        | 129           | 157               | 65                  | 120                | 4000.0                     | 5400                       | 4800                     | 6480                     | 8800                      | 11880                     |
| 28          | 672                | 41                 | 99.2           | 4228        | 130           | 176               | 77                  | 100                | 4200.0                     | 5670                       | 5040                     | 6804                     | 9240                      | 12474                     |
| 29          | 688                | 41.2               | 99.8           | 5780        | 131           | 189               | 85                  | 112                | 3890.0                     | 5252                       | 4668                     | 6302                     | 8558                      | 11553                     |
| 30          | 704                | 40.4               | 97.3           | 4163        | 132           | 186               | 83                  | 99                 | 4800.0                     | 6480                       | 5760                     | 7776                     | 10560                     | 14256                     |

**Supplementary Table S2. Input and output data collected from farmer's field in rice-cowpea system.**

| Farmers | Labor<br>(man hr) | Machinery<br>(hr) | Diesel (l) | FYM (kg) | Rice seeds<br>(kg) | Cowpea Seeds<br>(kg) | N (kg) | P (kg) | K (kg) | Rice Grain yield<br>(kg) | Rice straw yield<br>(kg) | Cowpea yield (kg) | Cowpea residue<br>yield (kg) |
|---------|-------------------|-------------------|------------|----------|--------------------|----------------------|--------|--------|--------|--------------------------|--------------------------|-------------------|------------------------------|
| 1       | 72.9              | 29.6              | 45.656028  | 6120     | 59                 | 17                   | 90     | 64     | 80     | 3795                     | 5123                     | 990               | 1584                         |
| 2       | 68.04             | 28.26             | 44.881848  | 6365     | 58                 | 17                   | 95     | 72     | 71     | 3278                     | 4425                     | 855               | 1368                         |
| 3       | 74.52             | 27.46             | 44.365728  | 6242     | 58                 | 17                   | 87     | 59     | 66     | 4357                     | 5882                     | 1136.7            | 1819                         |
| 4       | 81                | 25.46             | 43.075428  | 6028     | 61                 | 17                   | 76     | 40     | 75     | 4830                     | 6521                     | 1260              | 2016                         |
| 5       | 89.1              | 23.46             | 41.098464  | 6089     | 63                 | 18                   | 84     | 54     | 74     | 6268                     | 8461                     | 1635              | 2616                         |
| 6       | 77.76             | 25.06             | 42.817368  | 6050     | 66                 | 19                   | 80     | 48     | 72     | 5750                     | 7763                     | 1500              | 2400                         |
| 7       | 74.52             | 26.66             | 41.560728  | 6977     | 61                 | 18                   | 83     | 52     | 71     | 6026                     | 8135                     | 1572              | 2515                         |
| 8       | 76.14             | 25.86             | 43.333488  | 5970     | 58                 | 17                   | 84     | 53     | 73     | 4888                     | 6598                     | 1275              | 2040                         |
| 9       | 79.38             | 24.66             | 42.559308  | 5930     | 59                 | 17                   | 82     | 50     | 71     | 4479                     | 6047                     | 1168.5            | 1870                         |
| 10      | 82.62             | 23.86             | 42.043188  | 5891     | 61                 | 17                   | 84     | 53     | 66     | 5463                     | 7374                     | 1425              | 2280                         |
| 11      | 81                | 24.26             | 42.301248  | 5851     | 61                 | 18                   | 87     | 59     | 70     | 4485                     | 6055                     | 1170              | 1872                         |
| 12      | 68.04             | 29.46             | 45.656028  | 5811     | 61                 | 18                   | 88     | 60     | 77     | 4600                     | 6210                     | 1200              | 1920                         |
| 13      | 63.18             | 30.26             | 46.172148  | 4651     | 62                 | 18                   | 90     | 64     | 73     | 4830                     | 6521                     | 1260              | 2016                         |
| 14      | 56.7              | 31.46             | 48.2176464 | 5731     | 62                 | 18                   | 94     | 70     | 69     | 5405                     | 7297                     | 1410              | 2256                         |
| 15      | 61.56             | 30.66             | 46.430208  | 5692     | 63                 | 18                   | 97     | 75     | 59     | 4370                     | 5900                     | 1140              | 1824                         |
| 16      | 63.18             | 30.26             | 46.172148  | 5652     | 63                 | 18                   | 106    | 90     | 68     | 4945                     | 6676                     | 1290              | 2064                         |
| 17      | 53.46             | 33.94             | 48.236628  | 5612     | 63                 | 18                   | 97     | 75     | 50     | 4577                     | 6179                     | 1194              | 1910                         |
| 18      | 58.32             | 33.14             | 47.720508  | 5572     | 64                 | 18                   | 99     | 79     | 68     | 5175                     | 6986                     | 1350              | 2160                         |
| 19      | 59.94             | 33.54             | 47.978568  | 5532     | 64                 | 18                   | 103    | 85     | 71     | 5256                     | 7095                     | 1371              | 2194                         |
| 20      | 51.84             | 35.14             | 49.010808  | 5493     | 65                 | 18                   | 94     | 70     | 67     | 4888                     | 6598                     | 1275              | 2040                         |
| 21      | 48.6              | 35.94             | 49.526928  | 7956     | 65                 | 19                   | 90     | 64     | 60     | 4600                     | 6210                     | 1200              | 1920                         |
| 22      | 56.7              | 36.34             | 47.496108  | 5413     | 66                 | 19                   | 92     | 67     | 66     | 4715                     | 6365                     | 1230              | 1968                         |
| 23      | 59.94             | 34.74             | 48.752748  | 5875     | 66                 | 19                   | 93     | 69     | 64     | 4830                     | 6521                     | 1260              | 2016                         |
| 24      | 63.18             | 35.18             | 49.268868  | 5334     | 66                 | 19                   | 97     | 75     | 68     | 5060                     | 6831                     | 1320              | 2112                         |
| 25      | 68.04             | 30.78             | 45.656028  | 5294     | 67                 | 19                   | 99     | 79     | 65     | 4543                     | 6132                     | 1185              | 1896                         |
| 26      | 72.9              | 28.78             | 42.076848  | 5254     | 67                 | 19                   | 83     | 52     | 71     | 4370                     | 5900                     | 1140              | 1824                         |
| 27      | 77.76             | 26.78             | 43.075428  | 7222     | 68                 | 19                   | 84     | 54     | 76     | 4600                     | 6210                     | 1200              | 1920                         |
| 28      | 68.04             | 30.78             | 45.656028  | 5174     | 68                 | 19                   | 90     | 64     | 63     | 4830                     | 6521                     | 1260              | 2016                         |
| 29      | 69.66             | 31.18             | 45.914088  | 7075     | 69                 | 19                   | 94     | 70     | 71     | 4474                     | 6039                     | 1167              | 1867                         |
| 30      | 71.28             | 29.58             | 44.881848  | 5095     | 69                 | 19                   | 93     | 69     | 63     | 5520                     | 7452                     | 1440              | 2304                         |
